# Supplementary material for: Heparin-based hydrogel scaffolding alters the transcriptomic profile and increases the chemoresistance of MDA-MB-231 triple-negative breast cancer cells
Source: Royal Society of Chemistry journal article supplement (doi:10.1039/c9bm01481k), 2020-01-01
Supplement: c9bm01481k2.zip [file c9bm01481k2.zip]

NAME	DESCRIPTION	GENE_SYMBOL	GENE_TITLE	SCORE
AC241585.3	na	null	null	4.3987517
NUTM2G	na	null	null	4.396685
AC092171.1	na	null	null	4.3926954
CICP19	na	null	null	4.348457
AC009078.3	na	null	null	4.2946134
AC131212.3	na	null	null	4.2822084
CICP3	na	null	null	4.2653503
AC009088.1	na	null	null	4.2586846
COL16A1	na	null	null	4.251677
COX7A1	na	null	null	4.195456
AC133919.3	na	null	null	4.1187177
CICP13	na	null	null	4.05001
CICP6	na	null	null	4.0342875
C11orf91	na	null	null	4.02498
ABCC6	na	null	null	4.017964
LINC00319	na	null	null	3.9977465
AL031714.1	na	null	null	3.9827728
CU639417.5	na	null	null	3.9581852
NKPD1	na	null	null	3.9553444
CDHR5	na	null	null	3.9461355
ZBTB12BP	na	null	null	3.914348
AP001527.2	na	null	null	3.9078922
AC241377.3	na	null	null	3.8989089
AC245100.8	na	null	null	3.891818
LILRB3	na	null	null	3.8858662
AC138035.3	na	null	null	3.880028
CICP7	na	null	null	3.8693073
SERHL2	na	null	null	3.8523471
AC093249.6	na	null	null	3.840624
SCART1	na	null	null	3.819053
LRP5L	na	null	null	3.7931511
OBSCN	na	null	null	3.790908
LENG8	na	null	null	3.7689993
AGAP7P	na	null	null	3.7629256
CICP5	na	null	null	3.762652
ATP2C2	na	null	null	3.7284455
FAM27E2	na	null	null	3.7254305
PPP3CB-AS1	na	null	null	3.717245
LINC01001	na	null	null	3.7155006
CNIH2	na	null	null	3.7111049
EVA1B	na	null	null	3.7102551
NPIPB11	na	null	null	3.705786
GOLGA8A	na	null	null	3.6996026
AC234772.2	na	null	null	3.6968067
AGAP10P	na	null	null	3.694255
PHKG1	na	null	null	3.6897953
SLFNL1	na	null	null	3.6872182
AC097381.1	na	null	null	3.6831276
AC011005.1	na	null	null	3.6774683
NSUN5P2	na	null	null	3.6653647
CICP9	na	null	null	3.6527722
FAM27E3	na	null	null	3.6484494
SLC34A3	na	null	null	3.6433823
AL355987.4	na	null	null	3.6402612
PLA2G6	na	null	null	3.6373417
AL133216.2	na	null	null	3.6326087
AP001107.1	na	null	null	3.6278799
AC025171.1	na	null	null	3.6162786
NPIPB3	na	null	null	3.6104996
KCNIP2	na	null	null	3.5978675
ID4	na	null	null	3.594338
AC137932.3	na	null	null	3.5902324
GOLGA8B	na	null	null	3.5751626
CAPN12	na	null	null	3.5738447
RTEL1-TNFRSF6B	na	null	null	3.5404491
AL391987.1	na	null	null	3.5401962
AC005776.2	na	null	null	3.5382974
AL139424.3	na	null	null	3.5382974
ACACB	na	null	null	3.5381517
MFSD7	na	null	null	3.533549
CSPG4P12	na	null	null	3.5242393
SLC22A20P	na	null	null	3.5167325
NPIPB13	na	null	null	3.5165236
PEG13	na	null	null	3.5073109
NPIPB12	na	null	null	3.5068889
CICP14	na	null	null	3.4924972
AC245060.5	na	null	null	3.4902983
NPIPB10P	na	null	null	3.4762857
C1orf159	na	null	null	3.4602852
ZDHHC23	na	null	null	3.445959
ANKS3	na	null	null	3.4235213
CAPN10	na	null	null	3.4166775
GIGYF1	na	null	null	3.4165413
AL133330.1	na	null	null	3.414902
GTF2IP12	na	null	null	3.4124541
EPN2-AS1	na	null	null	3.3943472
ZNF784	na	null	null	3.386414
CICP27	na	null	null	3.377648
ADAMTS7	na	null	null	3.372371
SNX32	na	null	null	3.3718553
CICP23	na	null	null	3.3651063
LIMD2	na	null	null	3.3616972
CCDC57	na	null	null	3.3587184
CSAD	na	null	null	3.3275776
KRBA1	na	null	null	3.3231716
NPIPB4	na	null	null	3.317161
AGAP6	na	null	null	3.3042066
NPIPB2	na	null	null	3.301161
AGAP12P	na	null	null	3.3003707
AC006330.1	na	null	null	3.2934952
CICP2	na	null	null	3.2903397
COL18A1-AS1	na	null	null	3.286827
HERC2P10	na	null	null	3.282319
AP003392.1	na	null	null	3.2816327
CCDC194	na	null	null	3.2807221
LINC00313	na	null	null	3.2797108
AL117379.1	na	null	null	3.2702541
CICP16	na	null	null	3.2697215
MUC6	na	null	null	3.2663877
AC093525.7	na	null	null	3.2575197
PRKXP1	na	null	null	3.2472813
AC080188.2	na	null	null	3.245509
AKAP17A	na	null	null	3.2444446
ZNF324	na	null	null	3.2440784
CSPG4P10	na	null	null	3.2412624
PHLDB3	na	null	null	3.2373724
ACVR2B-AS1	na	null	null	3.233501
MAPK8IP3	na	null	null	3.233287
FAM157C	na	null	null	3.2249763
SPATA33	na	null	null	3.218308
HSF4	na	null	null	3.2170296
NPIPB1P	na	null	null	3.2144158
SLC25A5-AS1	na	null	null	3.2102668
ZNF783	na	null	null	3.1835787
AC004890.3	na	null	null	3.1801603
ZNF786	na	null	null	3.179105
MYL5	na	null	null	3.1755297
AC100788.2	na	null	null	3.1708515
AGAP14P	na	null	null	3.1556396
AGAP4	na	null	null	3.1528935
SRRM2-AS1	na	null	null	3.1509397
C20orf144	na	null	null	3.1504846
SPDYE3	na	null	null	3.1477876
SRRM1P3	na	null	null	3.1459694
AC004893.2	na	null	null	3.1354444
TMEM120B	na	null	null	3.133731
AC243562.1	na	null	null	3.129115
HOOK2	na	null	null	3.1288085
DBH-AS1	na	null	null	3.128185
AF131215.6	na	null	null	3.123498
SPTBN2	na	null	null	3.1229446
NNAT	na	null	null	3.116485
FAM83H	na	null	null	3.1132011
AC008894.3	na	null	null	3.1127622
PLEKHO2	na	null	null	3.1121976
PLK3	na	null	null	3.1114788
PLEKHG5	na	null	null	3.1077285
NOP9	na	null	null	3.0958602
BORCS8	na	null	null	3.0847666
RILPL1	na	null	null	3.0837429
MYH7B	na	null	null	3.0833225
SLFNL1-AS1	na	null	null	3.0812876
AL137127.1	na	null	null	3.080226
SETD1B	na	null	null	3.0773609
AC137932.1	na	null	null	3.076609
PHYKPL	na	null	null	3.0710394
AC007731.4	na	null	null	3.0687797
RSRP1	na	null	null	3.0651245
AC110056.1	na	null	null	3.05985
MAN2C1	na	null	null	3.0593505
AC074212.1	na	null	null	3.0554833
KMT2E-AS1	na	null	null	3.050074
ZNF682	na	null	null	3.050074
FLJ31356	na	null	null	3.0493114
ABTB2	na	null	null	3.044939
AF117829.1	na	null	null	3.0378315
NOXA1	na	null	null	3.0329616
GOLGA8T	na	null	null	3.030063
TOP3B	na	null	null	3.0244198
AL583722.4	na	null	null	3.0209408
ZNF512B	na	null	null	3.0093803
PQLC1	na	null	null	3.0090623
CHD5	na	null	null	2.9984524
ITPKA	na	null	null	2.9978285
STARD9	na	null	null	2.996349
NUTM2F	na	null	null	2.980585
AC010761.3	na	null	null	2.9788423
AC069281.2	na	null	null	2.978842
NPHP4	na	null	null	2.9781532
ACP4	na	null	null	2.9751132
QRFP	na	null	null	2.9749343
KRT87P	na	null	null	2.9679914
AC103810.5	na	null	null	2.9678931
USP35	na	null	null	2.9678764
FAM196A	na	null	null	2.9672577
MAP3K10	na	null	null	2.9622164
NEK8	na	null	null	2.9618757
SLC38A10	na	null	null	2.955915
ANKMY1	na	null	null	2.948303
DGKD	na	null	null	2.947947
ZNF767P	na	null	null	2.947746
GAS6-AS1	na	null	null	2.9469838
SH3D21	na	null	null	2.9450464
ZNF439	na	null	null	2.9444623
AC026124.1	na	null	null	2.9420204
UVSSA	na	null	null	2.940765
DNLZ	na	null	null	2.9400413
C20orf204	na	null	null	2.9386034
ESRRAP1	na	null	null	2.9382448
C21orf2	na	null	null	2.9273746
ADM2	na	null	null	2.927176
AC007383.2	na	null	null	2.9256546
GPR173	na	null	null	2.921488
NPIPB15	na	null	null	2.919077
ZXDC	na	null	null	2.917429
RASA4DP	na	null	null	2.916423
AL031587.6	na	null	null	2.9149354
LINC00484	na	null	null	2.9142962
PRPF40B	na	null	null	2.906533
NINL	na	null	null	2.9065087
CICP18	na	null	null	2.9041946
TPRA1	na	null	null	2.9025946
FLNB-AS1	na	null	null	2.9018686
AL669831.3	na	null	null	2.9012473
BRF1	na	null	null	2.8978078
ZBTB40	na	null	null	2.8941154
ENGASE	na	null	null	2.8925927
DMPK	na	null	null	2.8878887
FLYWCH1	na	null	null	2.8868415
KRT18P7	na	null	null	2.8858147
AFG3L1P	na	null	null	2.8731318
CYP2E1	na	null	null	2.8682399
FBF1	na	null	null	2.8681319
CHAD	na	null	null	2.8665257
B4GALNT4	na	null	null	2.86313
TMPRSS9	na	null	null	2.8602695
GPR162	na	null	null	2.8565445
AC005865.2	na	null	null	2.8559816
NRBP2	na	null	null	2.8539393
TAS2R30	na	null	null	2.8524482
PLEKHH1	na	null	null	2.847781
MLYCD	na	null	null	2.8464694
HERC2P3	na	null	null	2.8370762
GOLGA6L9	na	null	null	2.8361433
BACH1-IT1	na	null	null	2.832911
SLC9A5	na	null	null	2.8326309
BRD1	na	null	null	2.8305933
CACNA1A	na	null	null	2.8222404
AC002306.1	na	null	null	2.82224
GUSBP1	na	null	null	2.8205993
CRACR2B	na	null	null	2.8139644
SEPT14P19	na	null	null	2.807055
CLUHP3	na	null	null	2.8064775
PHYHIP	na	null	null	2.8028631
ST20-AS1	na	null	null	2.8028631
HEXDC	na	null	null	2.801558
WDR81	na	null	null	2.7957482
AL035448.1	na	null	null	2.7911706
BX324167.2	na	null	null	2.7911704
METRN	na	null	null	2.790171
HERC2P9	na	null	null	2.7794194
MAPK11	na	null	null	2.7777498
GPT	na	null	null	2.776655
AC138409.2	na	null	null	2.7740965
MC1R	na	null	null	2.7676237
ZNF337	na	null	null	2.7676237
NISCH	na	null	null	2.7606122
GJC2	na	null	null	2.7547374
CYP21A1P	na	null	null	2.7536685
FAM193A	na	null	null	2.7514818
AL627230.7	na	null	null	2.741733
RBM19	na	null	null	2.7401025
AC104129.1	na	null	null	2.7367733
AC025171.2	na	null	null	2.7350523
TRIM74	na	null	null	2.734093
DAAM2	na	null	null	2.733959
RNF224	na	null	null	2.7322443
FLJ13224	na	null	null	2.7306392
RGL3	na	null	null	2.7294362
FUK	na	null	null	2.729355
ANO8	na	null	null	2.7278776
JMJD1C-AS1	na	null	null	2.7261672
ZNF282	na	null	null	2.7228894
PABPC1L	na	null	null	2.7225385
FEM1A	na	null	null	2.7153645
GPER1	na	null	null	2.7152624
FBXL16	na	null	null	2.7117417
CCDC114	na	null	null	2.710447
ABCC10	na	null	null	2.7096934
TSSK5P	na	null	null	2.7074406
CYP27B1	na	null	null	2.7074406
CEP250	na	null	null	2.7026289
CDK11A	na	null	null	2.69976
HECTD4	na	null	null	2.6991785
HDAC10	na	null	null	2.69693
CLCN2	na	null	null	2.6966107
AL031432.2	na	null	null	2.6942437
OR6D1P	na	null	null	2.6939814
ESRRAP2	na	null	null	2.6939812
AC018638.4	na	null	null	2.6931794
AL121772.1	na	null	null	2.6924038
IKBKGP1	na	null	null	2.69157
D2HGDH	na	null	null	2.6912534
SH3GL1P2	na	null	null	2.690032
AC146944.3	na	null	null	2.6899247
SCAF1	na	null	null	2.6878598
AC012358.2	na	null	null	2.6850126
HERC2P2	na	null	null	2.6844447
PCSK7	na	null	null	2.6812656
FKBP6	na	null	null	2.6809359
RAD9A	na	null	null	2.6706269
ZNF444	na	null	null	2.6702347
IGSF6	na	null	null	2.6683872
SCARF1	na	null	null	2.6682403
EHMT1	na	null	null	2.6625292
AC110813.1	na	null	null	2.657489
RPL37P18	na	null	null	2.657489
AC007613.1	na	null	null	2.657489
FAM229A	na	null	null	2.6553333
CPT1B	na	null	null	2.652915
RPL7AP60	na	null	null	2.6525958
GP6	na	null	null	2.6525958
CEP295NL	na	null	null	2.6493683
STC2	na	null	null	2.6468668
DNASE1	na	null	null	2.646228
SARDH	na	null	null	2.6460004
AKAP2	na	null	null	2.6458883
GSE1	na	null	null	2.6456702
AGAP9	na	null	null	2.6454737
WDR27	na	null	null	2.6447368
KRT8P33	na	null	null	2.6372151
RELT	na	null	null	2.6368954
ANKRD6	na	null	null	2.6348627
CACNA2D2	na	null	null	2.6342244
ANGPT2	na	null	null	2.6325924
GPR62	na	null	null	2.6325922
NLRP1	na	null	null	2.6314356
TOGARAM2	na	null	null	2.6209304
AKNA	na	null	null	2.619604
CUL9	na	null	null	2.6187096
SAP30L-AS1	na	null	null	2.6164565
AC144450.1	na	null	null	2.6164565
C2orf82	na	null	null	2.6144798
ZNF324B	na	null	null	2.61328
UBE2Q2P1	na	null	null	2.6124272
NOL12	na	null	null	2.6033533
ATG16L2	na	null	null	2.6012719
MIRLET7BHG	na	null	null	2.5981233
TSNARE1	na	null	null	2.5953634
GOLGA3	na	null	null	2.5938485
AL606534.6	na	null	null	2.591108
TFAP2E	na	null	null	2.5907328
PTGER1	na	null	null	2.5890818
KCNK12	na	null	null	2.5791874
AC087222.1	na	null	null	2.5791872
AC083798.2	na	null	null	2.579122
CCDC102A	na	null	null	2.5771933
GTF2IP13	na	null	null	2.5764754
KMT2B	na	null	null	2.5729566
TMEM191B	na	null	null	2.5703309
AL449106.1	na	null	null	2.5702708
SNPH	na	null	null	2.568102
JARID2	na	null	null	2.567383
ARMC9	na	null	null	2.565928
ZBTB48	na	null	null	2.5649014
TAOK2	na	null	null	2.558834
PHLDB1	na	null	null	2.5583494
ANKRD11	na	null	null	2.555102
NPIPB5	na	null	null	2.5550272
ABCB8	na	null	null	2.5538456
AL162586.1	na	null	null	2.5524025
PCNX3	na	null	null	2.5488749
PPP1R26P1	na	null	null	2.5474017
AC005332.1	na	null	null	2.5474017
HERC2	na	null	null	2.5472949
GOLGA6L10	na	null	null	2.5424516
CACTIN	na	null	null	2.5420034
RPL21P122	na	null	null	2.540734
TBC1D8	na	null	null	2.5376418
RNF123	na	null	null	2.5375292
AC120024.1	na	null	null	2.5353403
BARHL1	na	null	null	2.5353403
PRKCG	na	null	null	2.5343966
STRADA	na	null	null	2.5331237
CILP2	na	null	null	2.5244107
AP000866.2	na	null	null	2.5178733
NOS1AP	na	null	null	2.5147946
GATD1	na	null	null	2.5135357
NEURL4	na	null	null	2.5125835
WFIKKN1	na	null	null	2.5125537
TEP1	na	null	null	2.5124145
TSC22D1-AS1	na	null	null	2.5106556
XRCC1	na	null	null	2.507269
EPS8L1	na	null	null	2.5071049
PPRC1	na	null	null	2.5045989
AGAP13P	na	null	null	2.5021503
AC008875.1	na	null	null	2.5010393
CLDN14	na	null	null	2.5010393
AC005519.2	na	null	null	2.5010393
FBXO41	na	null	null	2.5004423
FBXL14	na	null	null	2.496555
SUSD2	na	null	null	2.4951055
EVI5L	na	null	null	2.4894586
SSBP4	na	null	null	2.4884634
GOLGA6L17P	na	null	null	2.4862235
PXN-AS1	na	null	null	2.483869
EVC	na	null	null	2.4806938
SYMPK	na	null	null	2.4790843
ASAP1-IT2	na	null	null	2.4783492
SLC51A	na	null	null	2.4716804
ZEB1-AS1	na	null	null	2.471014
PVT1	na	null	null	2.4700668
TPRN	na	null	null	2.469051
ANXA2R	na	null	null	2.4684656
RPL29P14	na	null	null	2.4682214
FAM193B	na	null	null	2.4648287
SLC26A1	na	null	null	2.4648097
F8A2	na	null	null	2.4637733
AL136988.2	na	null	null	2.4600422
AL365356.4	na	null	null	2.4600422
MDGA1	na	null	null	2.4597828
COQ8A	na	null	null	2.4594944
DTNB	na	null	null	2.4584575
AL022311.1	na	null	null	2.4569623
TAZ	na	null	null	2.456868
ZNF668	na	null	null	2.4567473
ATP2C2-AS1	na	null	null	2.455454
PICART1	na	null	null	2.4542882
HIP1R	na	null	null	2.4503388
XRCC3	na	null	null	2.4482045
GPR176	na	null	null	2.4476402
EBF4	na	null	null	2.4461968
AC240565.1	na	null	null	2.446182
CYP2W1	na	null	null	2.4445121
MZF1	na	null	null	2.4443257
NDUFA6-AS1	na	null	null	2.4383595
SMAD6	na	null	null	2.4382725
GVINP1	na	null	null	2.437546
COL7A1	na	null	null	2.4353037
CSRNP1	na	null	null	2.4342961
CHFR	na	null	null	2.433581
ZNF79	na	null	null	2.4303987
SLC12A9	na	null	null	2.4300592
SLC2A11	na	null	null	2.429721
ANKRD13D	na	null	null	2.4291334
GRIN2B	na	null	null	2.4289677
AL135925.1	na	null	null	2.4276063
TMEM238	na	null	null	2.426828
NOP53	na	null	null	2.4260564
RAB11FIP3	na	null	null	2.421424
UBE2Q2P2	na	null	null	2.4207594
TRAPPC9	na	null	null	2.4204755
CCDC9	na	null	null	2.4199786
TET3	na	null	null	2.4196634
GOLGA8J	na	null	null	2.419509
MYO9B	na	null	null	2.4185781
TRIM66	na	null	null	2.4176853
FHOD3	na	null	null	2.4166932
STAG3L1	na	null	null	2.415828
LRIG1	na	null	null	2.415055
AL096870.2	na	null	null	2.41476
AC000078.1	na	null	null	2.4117298
AC107871.1	na	null	null	2.4117298
FAM157B	na	null	null	2.4093266
RREB1	na	null	null	2.407715
CCDC157	na	null	null	2.4067223
PRRC2B	na	null	null	2.4033127
CEP170B	na	null	null	2.4009378
SPRYD4	na	null	null	2.4004178
RPAP1	na	null	null	2.400328
NANOS1	na	null	null	2.3920937
PNPLA7	na	null	null	2.391336
AC021054.1	na	null	null	2.3907442
ZNF34	na	null	null	2.3891156
ZNF517	na	null	null	2.3881986
CLBA1	na	null	null	2.3878684
LINC00482	na	null	null	2.386408
RIMBP3B	na	null	null	2.3862016
CTDP1	na	null	null	2.3846428
MAP3K12	na	null	null	2.3843498
MEMO1	na	null	null	2.3817759
DIP2A	na	null	null	2.3817427
SZT2	na	null	null	2.38096
GLUD1P3	na	null	null	2.3808463
UCKL1-AS1	na	null	null	2.3798823
MAFF	na	null	null	2.3760548
COLQ	na	null	null	2.372478
AC087392.1	na	null	null	2.3677242
CHRFAM7A	na	null	null	2.3662596
RN7SL403P	na	null	null	2.3662596
AC068594.2	na	null	null	2.3662593
GNRH2	na	null	null	2.366259
PPP6R2	na	null	null	2.3644898
AP5Z1	na	null	null	2.3627224
PDGFA	na	null	null	2.361236
KIF1C	na	null	null	2.3603091
POU5F1	na	null	null	2.3600254
AC074032.1	na	null	null	2.358905
AL022323.3	na	null	null	2.3589048
HS6ST1P1	na	null	null	2.3586776
GMEB2	na	null	null	2.3579357
SLC26A6	na	null	null	2.3571
CUEDC1	na	null	null	2.356144
AC012066.1	na	null	null	2.3554757
MAMDC4	na	null	null	2.3538117
PEAK3	na	null	null	2.3536084
AC011498.6	na	null	null	2.3528237
AL513523.1	na	null	null	2.3527212
CLIP2	na	null	null	2.3523195
COL1A1	na	null	null	2.346502
MATN1-AS1	na	null	null	2.345731
SETD6	na	null	null	2.344095
HOMER2	na	null	null	2.3411303
SLC4A11	na	null	null	2.3396924
CCDC159	na	null	null	2.3354204
KIAA0556	na	null	null	2.335239
ARFGAP1	na	null	null	2.3332841
AC055811.4	na	null	null	2.333192
CICP26	na	null	null	2.3304603
PBLD	na	null	null	2.3296635
GPSM1	na	null	null	2.3295858
RPTOR	na	null	null	2.32938
ZNF316	na	null	null	2.3275363
GCKR	na	null	null	2.3259249
SLC9A3-AS1	na	null	null	2.3239381
KRT18P15	na	null	null	2.3231146
EP400	na	null	null	2.3223205
AC079305.1	na	null	null	2.3223193
PSTPIP1	na	null	null	2.3221962
STAC3	na	null	null	2.3221962
ADRB2	na	null	null	2.3219764
ZNF746	na	null	null	2.3219242
RUSC2	na	null	null	2.3173249
ADAMTSL5	na	null	null	2.3170712
SFXN5	na	null	null	2.312995
AATBC	na	null	null	2.3122911
PDPK2P	na	null	null	2.311432
ATG7	na	null	null	2.3106868
ZGPAT	na	null	null	2.3103557
DBP	na	null	null	2.309018
FRMD6-AS1	na	null	null	2.3084862
NECAB3	na	null	null	2.3079376
MIB2	na	null	null	2.3025908
BOC	na	null	null	2.302079
GRK2	na	null	null	2.3008525
CABIN1	na	null	null	2.296388
LCAT	na	null	null	2.2952602
JRK	na	null	null	2.2949915
SNX22	na	null	null	2.2948887
TRIM41	na	null	null	2.294218
PDE4DIP	na	null	null	2.2909741
OPLAH	na	null	null	2.2903378
STK11	na	null	null	2.2893567
VWA2	na	null	null	2.2890396
PTPN6	na	null	null	2.2877002
MAPK15	na	null	null	2.2859344
LINC01134	na	null	null	2.2850456
CICP1	na	null	null	2.2805822
GLI4	na	null	null	2.2790148
EML3	na	null	null	2.2786252
ABHD17A	na	null	null	2.2774508
AL627309.2	na	null	null	2.2765348
LBX2	na	null	null	2.2755604
COX20	na	null	null	2.275117
GFI1	na	null	null	2.2750657
PRICKLE2-AS3	na	null	null	2.2750657
ARL6IP4	na	null	null	2.2750657
AC114501.2	na	null	null	2.2750657
PANK2	na	null	null	2.2749383
AL133230.1	na	null	null	2.2748475
CTBP1-AS	na	null	null	2.2706807
AP000974.1	na	null	null	2.2664168
ITGA9-AS1	na	null	null	2.2664165
FASN	na	null	null	2.2655797
IKBKG	na	null	null	2.2635179
FBXW4P1	na	null	null	2.2596858
NUMA1	na	null	null	2.2572038
VAC14	na	null	null	2.2554362
FASTK	na	null	null	2.2550306
WWC1	na	null	null	2.2537327
CASKIN2	na	null	null	2.2518778
CSPG4P11	na	null	null	2.2518437
TBC1D22A	na	null	null	2.2508688
NTNG2	na	null	null	2.2496784
EID3	na	null	null	2.2489932
CTSW	na	null	null	2.2438707
RAPSN	na	null	null	2.243349
CTNS	na	null	null	2.2414703
MCRIP2	na	null	null	2.2383444
AP000662.1	na	null	null	2.2374632
COL8A2	na	null	null	2.2374632
ZNF839	na	null	null	2.2368257
CHRNB2	na	null	null	2.2363124
TAF4	na	null	null	2.236278
SKI	na	null	null	2.235162
C7orf43	na	null	null	2.2350423
SETD1A	na	null	null	2.2345064
RGS12	na	null	null	2.2334945
SYCE1	na	null	null	2.2319956
KIF9-AS1	na	null	null	2.2310648
AC122129.1	na	null	null	2.230701
DNAH1	na	null	null	2.2302654
HPDL	na	null	null	2.2262466
TEPSIN	na	null	null	2.2255378
NAT8L	na	null	null	2.2246852
PTPRM	na	null	null	2.2228744
SNAPC4	na	null	null	2.2219586
ANKRD36B	na	null	null	2.22057
AC009086.3	na	null	null	2.220278
SKOR1	na	null	null	2.2193832
CARD10	na	null	null	2.2188685
AC016405.1	na	null	null	2.2182193
TTC28-AS1	na	null	null	2.2142322
SERHL	na	null	null	2.2138598
DOC2A	na	null	null	2.2096527
TMEM198	na	null	null	2.2092133
PGAM1P7	na	null	null	2.2072709
CARD11	na	null	null	2.2044473
SH2D3A	na	null	null	2.2019114
CCDC88C	na	null	null	2.1996346
SLX4	na	null	null	2.1965744
ZSWIM9	na	null	null	2.1952484
EMILIN1	na	null	null	2.1946602
AC087392.5	na	null	null	2.194585
ZC3H18	na	null	null	2.1943135
HEMK1	na	null	null	2.191428
PPCDC	na	null	null	2.191138
LINC00511	na	null	null	2.1901782
RASSF8-AS1	na	null	null	2.18854
ACOXL	na	null	null	2.1864567
DRP2	na	null	null	2.1839705
SLC12A4	na	null	null	2.1832187
RAB24	na	null	null	2.1827612
WNK4	na	null	null	2.1817539
CREBZF	na	null	null	2.1806304
CELSR1	na	null	null	2.1777089
ZBTB17	na	null	null	2.1775613
INVS	na	null	null	2.1773882
UAP1L1	na	null	null	2.1768744
PLIN4	na	null	null	2.1759567
KCTD21-AS1	na	null	null	2.175646
ELL	na	null	null	2.1754863
TRPM4	na	null	null	2.1737278
AP5B1	na	null	null	2.1730368
AP003108.2	na	null	null	2.1724193
STAG3L2	na	null	null	2.1716928
DGAT1	na	null	null	2.171528
AKAP8	na	null	null	2.1698248
DUSP8P5	na	null	null	2.169304
AXIN1	na	null	null	2.1692953
SSBP3-AS1	na	null	null	2.1685297
RPS20P22	na	null	null	2.1685297
SNX25P1	na	null	null	2.1685297
AL356056.2	na	null	null	2.1685297
AC012100.3	na	null	null	2.1685297
AC010894.3	na	null	null	2.1685295
CDAN1	na	null	null	2.1681106
CBX4	na	null	null	2.1673937
PPP1R9B	na	null	null	2.1673827
NSUN5P1	na	null	null	2.1672537
CCNL2	na	null	null	2.165479
DENND4B	na	null	null	2.1627614
AC011330.1	na	null	null	2.1623049
UBXN11	na	null	null	2.161582
NBPF12	na	null	null	2.1605773
SPRN	na	null	null	2.157855
CHRNG	na	null	null	2.1571984
C2CD2	na	null	null	2.1567965
AC068594.1	na	null	null	2.1561282
PICK1	na	null	null	2.1537712
ARHGAP23P1	na	null	null	2.1514554
TPCN2	na	null	null	2.151062
KLF3P1	na	null	null	2.149052
ARHGEF34P	na	null	null	2.1482766
HSPD1P11	na	null	null	2.1478386
SNX18P9	na	null	null	2.1471975
RASAL2-AS1	na	null	null	2.1452267
CCDC94	na	null	null	2.1451693
DLK2	na	null	null	2.145136
TUBGCP6	na	null	null	2.1446278
FBXL19-AS1	na	null	null	2.1433456
DOCK6	na	null	null	2.1404634
ACTBP7	na	null	null	2.139012
ZNF526	na	null	null	2.1380246
SUGP2	na	null	null	2.1377378
GOLGA2P5	na	null	null	2.1370666
GRK6	na	null	null	2.1363738
ZNF394	na	null	null	2.133932
PIAS4	na	null	null	2.1328828
AL080317.3	na	null	null	2.132727
PISD	na	null	null	2.1322665
FRAT1	na	null	null	2.1311846
VPS51	na	null	null	2.1311786
SPAG5-AS1	na	null	null	2.1309545
ANO9	na	null	null	2.1300728
ARFRP1	na	null	null	2.130029
ZNF500	na	null	null	2.1293125
PNPLA3	na	null	null	2.1282747
LINGO3	na	null	null	2.1282513
AZIN2	na	null	null	2.1279056
EMILIN2	na	null	null	2.1277113
WDR59	na	null	null	2.127163
COL18A1	na	null	null	2.1263564
COL17A1	na	null	null	2.124151
AC092720.1	na	null	null	2.1167617
RIMBP3	na	null	null	2.116686
AC102953.2	na	null	null	2.1158285
AC129778.1	na	null	null	2.1157815
PILRB	na	null	null	2.1143837
ZFYVE27	na	null	null	2.1130264
MSTO2P	na	null	null	2.1127932
PLXNB3	na	null	null	2.1122465
BCR	na	null	null	2.1116607
ZFHX3	na	null	null	2.1115246
TMEM75	na	null	null	2.1100943
ZNF251	na	null	null	2.1075025
RCBTB2	na	null	null	2.1072586
CLASRP	na	null	null	2.1064792
DIS3L2	na	null	null	2.1056256
PPP6R1	na	null	null	2.1046584
SPIRE2	na	null	null	2.1043422
KANSL1	na	null	null	2.1039648
AL606534.5	na	null	null	2.103703
AL133346.1	na	null	null	2.1029449
PHBP6	na	null	null	2.102286
OSBP2	na	null	null	2.1011481
AC093525.6	na	null	null	2.1008043
WASH4P	na	null	null	2.0985808
ARFGAP2	na	null	null	2.0983224
IER5	na	null	null	2.0982945
PTCD1	na	null	null	2.0972066
MOV10	na	null	null	2.096603
AC138409.1	na	null	null	2.0959184
ZNF837	na	null	null	2.0952046
ASPSCR1	na	null	null	2.0949094
HPS1	na	null	null	2.0939937
C14orf93	na	null	null	2.0931687
DNM3	na	null	null	2.0921133
FOXP4-AS1	na	null	null	2.0920918
TRAF2	na	null	null	2.0906863
FAM166A	na	null	null	2.090254
ZNF410	na	null	null	2.0902538
AL669831.1	na	null	null	2.0901282
ACSF3	na	null	null	2.0899394
PLXNA1	na	null	null	2.0889406
ATG4B	na	null	null	2.0889187
YBX1P4	na	null	null	2.0886636
NBPF11	na	null	null	2.0865095
CC2D1B	na	null	null	2.085929
LINC01465	na	null	null	2.0846934
MICD	na	null	null	2.0841854
AC245297.1	na	null	null	2.0841851
AC145124.1	na	null	null	2.0841851
LILRA6	na	null	null	2.083742
MVB12B	na	null	null	2.0828762
SIPA1L3	na	null	null	2.081263
KDM2B	na	null	null	2.0792534
GATA6	na	null	null	2.077961
ZNF142	na	null	null	2.077022
ESRRA	na	null	null	2.0751119
MAN2A2	na	null	null	2.074492
TBC1D10B	na	null	null	2.0737245
SLC19A1	na	null	null	2.0731537
TRIM11	na	null	null	2.0723925
PLEKHO1	na	null	null	2.0715373
HSPG2	na	null	null	2.070127
PIGQ	na	null	null	2.0686285
AC243829.2	na	null	null	2.0681152
KMT5C	na	null	null	2.067007
UPK3B	na	null	null	2.0666177
MAST2	na	null	null	2.0665863
VAC14-AS1	na	null	null	2.0660768
PHKA2	na	null	null	2.065835
AL121772.3	na	null	null	2.065557
SPOUT1	na	null	null	2.0655334
CDC42BPB	na	null	null	2.0648737
PKD1L1	na	null	null	2.0648658
UBR4	na	null	null	2.0605814
PLEKHF1	na	null	null	2.0596414
PRKCZ-AS1	na	null	null	2.0595043
AC093525.10	na	null	null	2.0584664
AC004943.2	na	null	null	2.0571427
KCNV2	na	null	null	2.056845
PRC1-AS1	na	null	null	2.0539808
MICALL1	na	null	null	2.0531878
PGS1	na	null	null	2.0528069
HDGFL2	na	null	null	2.0493925
AC087481.3	na	null	null	2.0489588
HVCN1	na	null	null	2.0489585
AC129507.4	na	null	null	2.0489585
AC005324.3	na	null	null	2.0482075
TTC7A	na	null	null	2.0468552
SOGA1	na	null	null	2.0466578
TMEM259	na	null	null	2.0463147
AHNAK2	na	null	null	2.0451202
GGT2	na	null	null	2.0445025
LINC00926	na	null	null	2.0417967
ZNF408	na	null	null	2.0417373
AC127496.1	na	null	null	2.0416713
AC027682.4	na	null	null	2.0391932
NWD1	na	null	null	2.0391932
LGALS2	na	null	null	2.039193
STAG3L3	na	null	null	2.0370748
AC010768.2	na	null	null	2.0365994
PAPPA	na	null	null	2.036551
AC007216.3	na	null	null	2.0343895
GGA1	na	null	null	2.0343187
ZNF496	na	null	null	2.033029
ZCCHC18	na	null	null	2.0328684
PHBP15	na	null	null	2.0328684
PARP10	na	null	null	2.0325086
AC005329.1	na	null	null	2.0296814
SHANK2	na	null	null	2.0287561
RABL6	na	null	null	2.026561
COQ8B	na	null	null	2.0261772
NELFA	na	null	null	2.0229478
RASGRF1	na	null	null	2.0222707
ZDHHC8	na	null	null	2.0212326
RIN3	na	null	null	2.0206888
PPP1R16A	na	null	null	2.0202708
TMEM178A	na	null	null	2.0201592
TIMM44	na	null	null	2.0186822
RHBDD3	na	null	null	2.0158446
PLEKHM2	na	null	null	2.015783
AC124319.2	na	null	null	2.015142
ALDH16A1	na	null	null	2.014414
MIR600HG	na	null	null	2.0139856
RBCK1	na	null	null	2.0138757
AHSA2	na	null	null	2.0135164
SMG6	na	null	null	2.0129745
BTBD19	na	null	null	2.0126572
MICAL1	na	null	null	2.0126023
SRSF4	na	null	null	2.0122428
COX19	na	null	null	2.0120976
REPIN1	na	null	null	2.011612
ASXL1	na	null	null	2.0115378
SLC22A5	na	null	null	2.0105324
ZNF154	na	null	null	2.0104203
TFAP2A	na	null	null	2.0095978
CCDC22	na	null	null	2.009574
BRD9	na	null	null	2.0076077
EXD3	na	null	null	2.0061486
FBXL19	na	null	null	2.0058932
SLC25A27	na	null	null	2.0048153
RUBCN	na	null	null	2.004676
AC096564.1	na	null	null	2.0041802
NOP14-AS1	na	null	null	2.0023046
GPRIN1	na	null	null	2.0016508
POMT2	na	null	null	2.0011635
LINC01943	na	null	null	2.0009787
MGAT5B	na	null	null	2.000684
AC010616.1	na	null	null	1.9999986
DENND3	na	null	null	1.9989284
CAPS2	na	null	null	1.9984154
ZFYVE26	na	null	null	1.9972198
ANKRD36C	na	null	null	1.9965742
PLEKHG4	na	null	null	1.9962392
NELFB	na	null	null	1.9959481
INF2	na	null	null	1.9949481
WNT4	na	null	null	1.9937433
USP36	na	null	null	1.9934579
AL391422.3	na	null	null	1.9922745
PKN1	na	null	null	1.9921012
STARD13-AS	na	null	null	1.9916128
PCED1A	na	null	null	1.9915183
FBXW7	na	null	null	1.9910088
SNX8	na	null	null	1.9908918
HLX	na	null	null	1.989598
RHBDF1	na	null	null	1.9895879
C2CD4D	na	null	null	1.9889834
SURF6	na	null	null	1.9885124
AL121987.2	na	null	null	1.9875805
AMN	na	null	null	1.9859339
PCDHB17P	na	null	null	1.9837421
HS6ST3	na	null	null	1.9834148
SH3RF2	na	null	null	1.9833634
FAM27C	na	null	null	1.983327
PTK2B	na	null	null	1.9821457
RGL4	na	null	null	1.9820006
HSPA7	na	null	null	1.9816686
C19orf71	na	null	null	1.9815562
KDM2A	na	null	null	1.9797715
BANP	na	null	null	1.97689
BSN	na	null	null	1.9766862
SBF1	na	null	null	1.975631
TRIOBP	na	null	null	1.9746339
MLPH	na	null	null	1.9738364
AP4S1	na	null	null	1.972946
DCHS1	na	null	null	1.9728587
ATP13A1	na	null	null	1.9721146
AP006621.3	na	null	null	1.9718988
ZNF77	na	null	null	1.9709343
LINC01534	na	null	null	1.9708157
TATDN2P2	na	null	null	1.9705384
CEP164	na	null	null	1.9696766
HELZ2	na	null	null	1.9695988
TBC1D3J	na	null	null	1.9695796
AC009133.1	na	null	null	1.9681847
RRBP1	na	null	null	1.9676508
DHODH	na	null	null	1.9657041
AC067852.6	na	null	null	1.9641308
MLKL	na	null	null	1.9637886
NRF1	na	null	null	1.9604608
WIZ	na	null	null	1.9591572
CSNK1G2	na	null	null	1.9552495
TNK2	na	null	null	1.9541929
PLEKHM1P1	na	null	null	1.9528325
AC098591.1	na	null	null	1.9526788
RAD52	na	null	null	1.9523478
LRSAM1	na	null	null	1.9506309
TMEM94	na	null	null	1.9499713
ZNF212	na	null	null	1.9498813
ZSWIM8	na	null	null	1.9475856
ARRDC1	na	null	null	1.9467262
AC245014.3	na	null	null	1.9458168
SNORD83A	na	null	null	1.9450471
NAV2	na	null	null	1.9424378
TPH1	na	null	null	1.9418862
AC004803.1	na	null	null	1.9418862
PRDM15	na	null	null	1.9416128
ZNF335	na	null	null	1.9410671
DHX38	na	null	null	1.940708
ABL1	na	null	null	1.9402391
MYO15B	na	null	null	1.94002
GPR135	na	null	null	1.9379277
CYHR1	na	null	null	1.9356374
AC011510.1	na	null	null	1.934049
RAI1	na	null	null	1.9330853
AC090114.2	na	null	null	1.9328166
ZNF516	na	null	null	1.9327464
ADCY7	na	null	null	1.9322023
MIR762HG	na	null	null	1.9321998
ASMTL-AS1	na	null	null	1.9316617
AC118758.3	na	null	null	1.9303287
KLHL21	na	null	null	1.9299518
DGCR8	na	null	null	1.9292212
GOLGA8K	na	null	null	1.9280404
ZNF205	na	null	null	1.9251487
CPNE7	na	null	null	1.925032
POLR3H	na	null	null	1.9246974
PDE11A	na	null	null	1.9243246
AL512770.1	na	null	null	1.9229113
ASIC3	na	null	null	1.9226236
ZNF575	na	null	null	1.9224222
FAM222A	na	null	null	1.921813
COL5A1	na	null	null	1.921186
NEIL1	na	null	null	1.9207227
STK36	na	null	null	1.9188477
HELLPAR	na	null	null	1.9183329
RPS14P4	na	null	null	1.9167386
TYK2	na	null	null	1.9164402
C19orf44	na	null	null	1.9162806
WWC2-AS2	na	null	null	1.9161835
FSCN2	na	null	null	1.915924
PMS2P3	na	null	null	1.9148064
HIC2	na	null	null	1.9137388
IL11	na	null	null	1.9116771
HSPA6	na	null	null	1.9112723
PI4KA	na	null	null	1.9100428
IGHMBP2	na	null	null	1.9097024
PKD1	na	null	null	1.9093267
AL513477.1	na	null	null	1.9073623
MEX3D	na	null	null	1.9072759
AC022211.2	na	null	null	1.9072587
MAP2K7	na	null	null	1.9069704
CDK13	na	null	null	1.9068809
CCR10	na	null	null	1.9053441
AL049795.1	na	null	null	1.905344
AC091132.5	na	null	null	1.9043244
BICD1	na	null	null	1.9035827
MAP3K3	na	null	null	1.9029968
RBM12B-AS1	na	null	null	1.9014792
TCF25	na	null	null	1.9003423
CRACR2A	na	null	null	1.8998731
PGGHG	na	null	null	1.89948
AL031717.1	na	null	null	1.8986288
ZNF707	na	null	null	1.8969145
CREBBP	na	null	null	1.8955784
AL354726.1	na	null	null	1.8954204
KIAA1671	na	null	null	1.8941281
AL049840.1	na	null	null	1.893358
MKNK1	na	null	null	1.892972
KLC1	na	null	null	1.8922567
AC025884.2	na	null	null	1.8917441
CLDN15	na	null	null	1.8913924
WASH3P	na	null	null	1.890629
DNHD1	na	null	null	1.8900515
POLRMT	na	null	null	1.8891615
RNF216	na	null	null	1.8890667
PHRF1	na	null	null	1.8874974
MLLT1	na	null	null	1.8859867
TRMT2A	na	null	null	1.8847245
FLCN	na	null	null	1.8845646
AL390879.2	na	null	null	1.8838791
AC007216.2	na	null	null	1.8835533
GTF3C2-AS1	na	null	null	1.8835533
ZNF790-AS1	na	null	null	1.8835533
AC073046.1	na	null	null	1.8809515
LONP1	na	null	null	1.8808498
MSANTD2	na	null	null	1.8803833
AC004980.2	na	null	null	1.88033
LINC00886	na	null	null	1.8797135
SLC4A2	na	null	null	1.8791847
MKL1	na	null	null	1.8791199
UBXN6	na	null	null	1.8778793
IRF3	na	null	null	1.8767301
AL022323.4	na	null	null	1.8766607
SMG1P3	na	null	null	1.8764656
MROH1	na	null	null	1.8754884
TJAP1	na	null	null	1.8746977
LINC01547	na	null	null	1.8728335
MYO18A	na	null	null	1.8726996
LINC00106	na	null	null	1.8723463
LRP4	na	null	null	1.8722283
CCDC142	na	null	null	1.8718879
HIPK4	na	null	null	1.8706971
RMND5B	na	null	null	1.8706689
HRNR	na	null	null	1.8705431
FAM157A	na	null	null	1.8702954
CCDC150P1	na	null	null	1.8699564
ZNF362	na	null	null	1.8685863
ARHGAP27	na	null	null	1.8684813
AGAP3	na	null	null	1.866306
RAB26	na	null	null	1.8651404
BMS1P7	na	null	null	1.8632313
FAM27E4	na	null	null	1.86256
LINC01669	na	null	null	1.8625598
DLG5	na	null	null	1.8623921
PI4KAP2	na	null	null	1.8607817
ZNF558	na	null	null	1.8604205
TYSND1	na	null	null	1.859807
SGSM2	na	null	null	1.8588389
MED15	na	null	null	1.8584181
ZNF76	na	null	null	1.857757
PLXNA3	na	null	null	1.856352
GRAMD4	na	null	null	1.8554518
ZZEF1	na	null	null	1.855255
PER2	na	null	null	1.8543255
WASH6P	na	null	null	1.8543128
ASAP2	na	null	null	1.8542184
DPP9	na	null	null	1.8542016
CNTROB	na	null	null	1.8527604
Z93022.1	na	null	null	1.8518685
HMGA2	na	null	null	1.8514585
TLCD2	na	null	null	1.850916
AMIGO1	na	null	null	1.8506356
PELI3	na	null	null	1.8479314
TBC1D3B	na	null	null	1.8474977
DHRS4L1	na	null	null	1.8459125
ZNF446	na	null	null	1.845171
SPG7	na	null	null	1.8432814
TFR2	na	null	null	1.8430246
LLGL2	na	null	null	1.8428143
ZNF688	na	null	null	1.8426223
ADAMTSL2	na	null	null	1.8423233
GTF2IRD1	na	null	null	1.8419551
CERS4	na	null	null	1.8419081
RAPGEF3	na	null	null	1.8407142
CICP22	na	null	null	1.8405404
CICP4	na	null	null	1.8392975
RBM5	na	null	null	1.8381196
AP000759.1	na	null	null	1.8379647
NRARP	na	null	null	1.8369061
IBA57	na	null	null	1.8368381
SULT1A2	na	null	null	1.8368187
POLR2J3	na	null	null	1.8358465
NOTCH1	na	null	null	1.83541
HPS6	na	null	null	1.8351002
APC2	na	null	null	1.8348773
MAP3K8	na	null	null	1.8334762
PLXNB2	na	null	null	1.8333155
ARSA	na	null	null	1.8330804
ROR1	na	null	null	1.832369
SCAP	na	null	null	1.8321464
MIDN	na	null	null	1.8304062
MFSD12	na	null	null	1.830288
SLC25A25-AS1	na	null	null	1.8299234
RECQL5	na	null	null	1.8295821
LRRC46	na	null	null	1.829087
SDHAP1	na	null	null	1.8274956
DMWD	na	null	null	1.8272421
IQCC	na	null	null	1.8267095
CACHD1	na	null	null	1.8259553
HDAC6	na	null	null	1.8259552
AL451042.2	na	null	null	1.8248112
SDS	na	null	null	1.8241715
AC019205.2	na	null	null	1.8238659
TBKBP1	na	null	null	1.8232936
GABBR1	na	null	null	1.8168375
AQP11	na	null	null	1.8165296
AC134349.2	na	null	null	1.8152362
AL357060.2	na	null	null	1.8150258
DNM2	na	null	null	1.8148445
PIGG	na	null	null	1.8133968
ZNRF1	na	null	null	1.8117164
PPIP5K1	na	null	null	1.8116895
SIK1	na	null	null	1.8110601
AC009097.4	na	null	null	1.8105061
SIRT4	na	null	null	1.8105061
PRDX3P2	na	null	null	1.8105061
AC104791.1	na	null	null	1.810506
LINC01443	na	null	null	1.810506
IRAK1	na	null	null	1.8084124
VAV2	na	null	null	1.8070612
KIAA1468	na	null	null	1.8063207
SPDYE11	na	null	null	1.8060915
CCDC17	na	null	null	1.806049
VRK3	na	null	null	1.805093
AC020763.4	na	null	null	1.8024013
METTL22	na	null	null	1.8014791
ADARB1	na	null	null	1.8006624
RAB43P1	na	null	null	1.799586
NDUFA9P1	na	null	null	1.7991681
CAND2	na	null	null	1.799168
TECPR1	na	null	null	1.7988927
AC137932.2	na	null	null	1.7977761
DOT1L	na	null	null	1.7956891
ZBTB47	na	null	null	1.7942147
AL627309.5	na	null	null	1.7941163
DTX2P1	na	null	null	1.7939943
MTG1	na	null	null	1.7927334
GCDH	na	null	null	1.7919647
ZNF830	na	null	null	1.79174
SLC25A25	na	null	null	1.7907505
AC024940.1	na	null	null	1.7898105
GPR132	na	null	null	1.7891095
SLC2A8	na	null	null	1.7878431
ENTPD8	na	null	null	1.7876549
AL603756.1	na	null	null	1.787432
AC243562.3	na	null	null	1.7869735
SPDYE9P	na	null	null	1.786216
ARHGAP45	na	null	null	1.7853222
TM4SF19-AS1	na	null	null	1.7840563
DAPK1	na	null	null	1.7839462
STARD7-AS1	na	null	null	1.7826488
KLC2	na	null	null	1.7818952
AC006128.1	na	null	null	1.7816579
SIGLEC15	na	null	null	1.7810297
ZDHHC1	na	null	null	1.7804998
ANKRD36	na	null	null	1.7800047
USP20	na	null	null	1.7790071
SH3RF3	na	null	null	1.777586
REXO1	na	null	null	1.7761482
MAFK	na	null	null	1.7760808
SNTB1	na	null	null	1.7746693
CROCC	na	null	null	1.774184
PHLPP1	na	null	null	1.7736871
PCDHB18P	na	null	null	1.7732506
AC016586.1	na	null	null	1.7729808
ZNF696	na	null	null	1.7726902
THSD4	na	null	null	1.7726566
GLIS2	na	null	null	1.7722312
RANBP10	na	null	null	1.7719717
C6orf141	na	null	null	1.7719407
PHF8	na	null	null	1.771216
ANKRD16	na	null	null	1.7710474
PCDHGA10	na	null	null	1.7709957
TAGLN	na	null	null	1.7708896
ANKLE2	na	null	null	1.7703979
RASSF5	na	null	null	1.7699558
TRIM56	na	null	null	1.7697994
AC027237.4	na	null	null	1.769573
U47924.2	na	null	null	1.7695729
AC097376.1	na	null	null	1.7695727
CAMK1G	na	null	null	1.7695727
LINC01678	na	null	null	1.7695727
CCDC154	na	null	null	1.7695727
CTU1	na	null	null	1.7690399
CASZ1	na	null	null	1.7686774
HDAC7	na	null	null	1.7683204
PRRT3	na	null	null	1.7678436
NKX6-2	na	null	null	1.7670442
ERC2	na	null	null	1.7660913
TRMT44	na	null	null	1.764837
FGFR4	na	null	null	1.7647552
SMG1P2	na	null	null	1.7642143
EME2	na	null	null	1.763592
SOX15	na	null	null	1.7627856
RGS14	na	null	null	1.7618142
AC241952.1	na	null	null	1.7612185
FRS3	na	null	null	1.7610625
PKD1P6	na	null	null	1.7599198
MTSS1L	na	null	null	1.7589253
LMBR1L	na	null	null	1.7576921
DVL1	na	null	null	1.7574857
URGCP	na	null	null	1.7574275
AC068491.4	na	null	null	1.7574226
AL121832.3	na	null	null	1.7565006
SLC45A4	na	null	null	1.7560186
PCDHGA8	na	null	null	1.7559114
CCDC96	na	null	null	1.75391
PWWP2B	na	null	null	1.7531636
CHMP7	na	null	null	1.7525697
SIN3B	na	null	null	1.7521064
PCDHB6	na	null	null	1.7502953
NPM1P26	na	null	null	1.7496964
GLYCTK	na	null	null	1.7488221
YPEL4	na	null	null	1.7471573
AC079807.1	na	null	null	1.7471569
AEBP1	na	null	null	1.745143
STX1A	na	null	null	1.7448394
ZFAT	na	null	null	1.7446115
RALGPS1	na	null	null	1.7444247
P2RY11	na	null	null	1.7443917
PRPF6	na	null	null	1.7442493
FKRP	na	null	null	1.7439762
AL137077.1	na	null	null	1.7434171
TACR2	na	null	null	1.743417
SIRT7	na	null	null	1.7429162
CTTN	na	null	null	1.7419517
MAPK8IP1	na	null	null	1.7408313
TMEM129	na	null	null	1.7405359
CC2D1A	na	null	null	1.738631
AC110079.1	na	null	null	1.738033
TMEM184A	na	null	null	1.7378156
ATP6V1B1	na	null	null	1.7377566
SMARCA4	na	null	null	1.7373348
SIPA1L2	na	null	null	1.7357066
AC092139.3	na	null	null	1.7349566
AL606534.2	na	null	null	1.7344223
GTPBP3	na	null	null	1.733417
SPEG	na	null	null	1.733371
MAPKBP1	na	null	null	1.7323856
ACAD10	na	null	null	1.7311113
HSPB9	na	null	null	1.7291697
KLF16	na	null	null	1.7286503
METTL12	na	null	null	1.7281832
ZBED1	na	null	null	1.7269286
AP3D1	na	null	null	1.7264259
PPP1R26	na	null	null	1.7262298
PPP1R13B	na	null	null	1.7260925
AHDC1	na	null	null	1.726092
TRIM73	na	null	null	1.7260327
LEMD2	na	null	null	1.7239974
ST7-AS1	na	null	null	1.7237136
SCUBE1	na	null	null	1.7226397
KIFC3	na	null	null	1.7226189
DECR2	na	null	null	1.7223926
ZNF460	na	null	null	1.721556
MIEF2	na	null	null	1.7214607
TBC1D24	na	null	null	1.7199074
CCDC146	na	null	null	1.719589
CR786580.1	na	null	null	1.7194747
ZNF628	na	null	null	1.7194686
ANKS6	na	null	null	1.7193992
LIME1	na	null	null	1.7187203
AP5S1	na	null	null	1.7185506
SMG1P5	na	null	null	1.7184421
MAMLD1	na	null	null	1.7183942
LRRC75A	na	null	null	1.7175275
CFL1P3	na	null	null	1.7172549
AC114490.1	na	null	null	1.7161239
PRSS27	na	null	null	1.7156322
TP73-AS1	na	null	null	1.7154487
ZNF263	na	null	null	1.714954
SPDYE21P	na	null	null	1.7139287
AC124283.4	na	null	null	1.7136153
BASP1	na	null	null	1.7130884
MAP3K9	na	null	null	1.7130752
SLC35E4	na	null	null	1.7126582
AC142086.6	na	null	null	1.7120737
BTG3-AS1	na	null	null	1.7105864
CNNM3	na	null	null	1.7105545
STK10	na	null	null	1.7105352
AC092278.1	na	null	null	1.7102768
EFCAB5	na	null	null	1.7102767
TPM2	na	null	null	1.7092537
LINC00863	na	null	null	1.7087601
MFSD3	na	null	null	1.708705
TRRAP	na	null	null	1.7076498
AC103810.3	na	null	null	1.7075889
HAS2-AS1	na	null	null	1.707423
HDAC4	na	null	null	1.7066194
PAPD7	na	null	null	1.706544
ACAP3	na	null	null	1.7062244
RARA-AS1	na	null	null	1.7054737
SOCS7	na	null	null	1.705147
INO80	na	null	null	1.7051138
XRRA1	na	null	null	1.7050855
PCGF3	na	null	null	1.7049977
RNF213	na	null	null	1.7039713
WASH2P	na	null	null	1.7036971
PDCD11	na	null	null	1.7036405
ZNF133	na	null	null	1.7028276
RAPGEFL1	na	null	null	1.7028203
ZNF787	na	null	null	1.7024606
FBXL12	na	null	null	1.7020576
ENO3	na	null	null	1.7018416
AC138028.2	na	null	null	1.7013463
C15orf52	na	null	null	1.7006631
CU639417.1	na	null	null	1.7005539
FBXW9	na	null	null	1.7000961
DDX51	na	null	null	1.6988676
AL691432.2	na	null	null	1.6977918
GTPBP6	na	null	null	1.6968315
ECM2	na	null	null	1.6955712
HOXB5	na	null	null	1.6955711
SNX18P5	na	null	null	1.6955711
FBXL22	na	null	null	1.6955711
AC245297.2	na	null	null	1.6955711
TOB2P1	na	null	null	1.6955711
RPL6P2	na	null	null	1.695571
AC005224.1	na	null	null	1.6955708
ABCA7	na	null	null	1.6948744
THTPA	na	null	null	1.6943184
METTL15P1	na	null	null	1.6940938
GTPBP2	na	null	null	1.6931763
AKT1	na	null	null	1.6911298
GAK	na	null	null	1.6910336
POLG	na	null	null	1.6908935
SAMD10	na	null	null	1.6904728
FAM160B2	na	null	null	1.6901011
CHST2	na	null	null	1.6890656
IQCH	na	null	null	1.6870087
MAP1A	na	null	null	1.6870086
AGBL5-IT1	na	null	null	1.6870085
C2CD2L	na	null	null	1.6858267
UPP1	na	null	null	1.68458
RPS6KB2	na	null	null	1.6842186
SLC22A23	na	null	null	1.6828449
NPEPL1	na	null	null	1.681619
RGS3	na	null	null	1.6806396
TMEM266	na	null	null	1.6783745
CFAP45	na	null	null	1.6779724
ARAP1-AS2	na	null	null	1.6779724
TOR4A	na	null	null	1.6777067
AL021453.1	na	null	null	1.6773533
NFRKB	na	null	null	1.6771978
ITPKB	na	null	null	1.6769909
WASF4P	na	null	null	1.6767356
THAP4	na	null	null	1.675557
PODXL2	na	null	null	1.6753807
ARHGAP39	na	null	null	1.6753544
FRAT2	na	null	null	1.6741652
PKD1P1	na	null	null	1.6738476
SYT5	na	null	null	1.6734451
AC008147.3	na	null	null	1.6734451
AC103703.1	na	null	null	1.673445
AC084018.2	na	null	null	1.6709417
AL596202.1	na	null	null	1.6709417
PRAG1	na	null	null	1.6702302
OGN	na	null	null	1.6692696
CDK12	na	null	null	1.6691395
OSBPL5	na	null	null	1.6681997
PRDM8	na	null	null	1.6653033
MEGF6	na	null	null	1.6650467
CAPRIN2	na	null	null	1.662812
AC138969.2	na	null	null	1.6626451
PAOX	na	null	null	1.6611681
AC138951.1	na	null	null	1.6605352
ABCA2	na	null	null	1.6600999
DNAH14	na	null	null	1.6580542
GPC2	na	null	null	1.6573731
TMC6	na	null	null	1.6573265
VASH1	na	null	null	1.6567976
SEC31B	na	null	null	1.6558901
SLCO3A1	na	null	null	1.655856
ING5	na	null	null	1.6557083
BRPF1	na	null	null	1.653998
LAMA5-AS1	na	null	null	1.6535177
TYW1B	na	null	null	1.6527996
PHACTR1	na	null	null	1.6499907
PPFIA1	na	null	null	1.6488853
DAPK3	na	null	null	1.6485237
SPIDR	na	null	null	1.648364
NBPF15	na	null	null	1.6477365
WDR97	na	null	null	1.6468824
DNM1	na	null	null	1.6468637
CRAMP1	na	null	null	1.6468157
LTB4R	na	null	null	1.6465273
SH3BP4	na	null	null	1.6462573
TARBP1	na	null	null	1.645629
HMG20B	na	null	null	1.6450804
SNTA1	na	null	null	1.6448581
DUSP1	na	null	null	1.6447711
FGFR1	na	null	null	1.64345
HAUS7	na	null	null	1.6434366
RAI1-AS1	na	null	null	1.6434364
AP000640.1	na	null	null	1.6434364
TBC1D3E	na	null	null	1.6432973
SAMD4A	na	null	null	1.6432388
ARHGAP22	na	null	null	1.642932
CDK11B	na	null	null	1.6428801
TBC1D3H	na	null	null	1.6428674
IQSEC1	na	null	null	1.6416701
JAG2	na	null	null	1.6404121
AC240565.2	na	null	null	1.640386
TMEM202-AS1	na	null	null	1.640096
AOC2	na	null	null	1.639833
MBD1	na	null	null	1.6396608
MORC2	na	null	null	1.6396505
SLC17A9	na	null	null	1.6394628
EML6	na	null	null	1.6394559
ID2	na	null	null	1.6373192
TSSC4	na	null	null	1.6372302
ARAP1	na	null	null	1.637088
BICRA	na	null	null	1.6369768
PITX1	na	null	null	1.6359901
MIR647	na	null	null	1.6352841
LINC00265	na	null	null	1.634942
USE1	na	null	null	1.6330413
OBSL1	na	null	null	1.6329931
BBS5	na	null	null	1.6326699
GNB1L	na	null	null	1.6322492
C2CD3	na	null	null	1.6317776
LINC01160	na	null	null	1.6316345
CAMKK1	na	null	null	1.6312653
AC026471.1	na	null	null	1.6309896
ATPAF2	na	null	null	1.6308408
ELMO3	na	null	null	1.6307439
FHOD1	na	null	null	1.630556
UCN2	na	null	null	1.6297209
PI4KAP1	na	null	null	1.6276922
AC002524.1	na	null	null	1.6274662
PRR7	na	null	null	1.6266178
LIPE	na	null	null	1.6266173
MDM4	na	null	null	1.6265762
NBPF26	na	null	null	1.6265525
WASH7P	na	null	null	1.6263763
SFRP5	na	null	null	1.6252804
SOX21-AS1	na	null	null	1.6245669
LGR5	na	null	null	1.6245669
MCM3AP	na	null	null	1.6237346
LRRC45	na	null	null	1.6235703
SH3RF3-AS1	na	null	null	1.6228298
AC016397.1	na	null	null	1.6221986
RBBP4P1	na	null	null	1.6221986
LEF1	na	null	null	1.6221551
FBRSL1	na	null	null	1.6220076
HCG4B	na	null	null	1.6216209
NPAS3	na	null	null	1.6216208
ZNF598	na	null	null	1.621542
AC092299.1	na	null	null	1.6202122
LINC00476	na	null	null	1.6198708
NPIPB8	na	null	null	1.6193035
PKD1P5	na	null	null	1.6187682
EVL	na	null	null	1.6176714
AC005899.8	na	null	null	1.6169726
AC137055.1	na	null	null	1.616853
ARHGAP23	na	null	null	1.6167005
KMT2D	na	null	null	1.615793
DEF8	na	null	null	1.6151018
ARHGEF11	na	null	null	1.6142894
RAPGEF1	na	null	null	1.6134571
GCN1	na	null	null	1.6121125
DPY19L2P3	na	null	null	1.6120901
DGKI	na	null	null	1.6107928
AC006001.3	na	null	null	1.6101526
NPRL3	na	null	null	1.6094058
MRNIP	na	null	null	1.6090034
UBE2Q2L	na	null	null	1.6089171
BOLA3-AS1	na	null	null	1.6089171
AC144652.1	na	null	null	1.6089171
SYNPO2	na	null	null	1.6089169
CDK10	na	null	null	1.607665
DIDO1	na	null	null	1.6076638
ARHGEF40	na	null	null	1.6069319
PTPRF	na	null	null	1.606838
PCDHGA7	na	null	null	1.6066506
MRC2	na	null	null	1.6056453
ZCCHC14	na	null	null	1.6049097
MICALL2	na	null	null	1.6041961
PRR26	na	null	null	1.6029344
DGKQ	na	null	null	1.602749
ARAP3	na	null	null	1.6012698
PCBP2-OT1	na	null	null	1.6009254
LLPH-AS1	na	null	null	1.6004002
DDX11L16	na	null	null	1.6004002
AC018529.1	na	null	null	1.6004002
AC145423.2	na	null	null	1.6004001
AC046158.4	na	null	null	1.6004001
TRABD	na	null	null	1.599536
RUNX1	na	null	null	1.5984892
EXT1	na	null	null	1.5982177
DNMT3A	na	null	null	1.5972039
AFDN	na	null	null	1.5970035
SPDYE5	na	null	null	1.596171
RIPOR1	na	null	null	1.5961487
ESRP2	na	null	null	1.5961422
CROCCP3	na	null	null	1.595082
MCAT	na	null	null	1.5950056
PRSS51	na	null	null	1.5949887
IRX5	na	null	null	1.5937335
COL15A1	na	null	null	1.5928396
AC080128.2	na	null	null	1.5923074
HIVEP3	na	null	null	1.5921782
FAM21EP	na	null	null	1.5920476
AC012313.1	na	null	null	1.5915748
RNPEPL1	na	null	null	1.5906562
PTPN21	na	null	null	1.5902665
AP005018.2	na	null	null	1.5900736
SH3TC1	na	null	null	1.5896374
BMS1P8	na	null	null	1.5884193
CUL7	na	null	null	1.5874101
PHBP5	na	null	null	1.5864314
MFSD11	na	null	null	1.5848333
AC127496.7	na	null	null	1.5822319
SMAD7	na	null	null	1.5805256
RFX1	na	null	null	1.5804298
AC136469.2	na	null	null	1.5801936
AC009065.4	na	null	null	1.5801929
ALPK3	na	null	null	1.5787551
INTS1	na	null	null	1.5785552
LINC00205	na	null	null	1.5771427
MED17	na	null	null	1.5763063
PIEZO1	na	null	null	1.5760137
AL589993.1	na	null	null	1.5757235
SLC25A34	na	null	null	1.5757234
AC093162.2	na	null	null	1.5755739
AC003102.1	na	null	null	1.5752281
PLCG1	na	null	null	1.5751684
ATXN2	na	null	null	1.5747355
GOLGA6L5P	na	null	null	1.5745856
RHOT2	na	null	null	1.5740863
C7orf26	na	null	null	1.5735346
AC099795.2	na	null	null	1.572761
MTND1P23	na	null	null	1.5726182
AMY2B	na	null	null	1.5722252
USP49	na	null	null	1.5719347
TANGO6	na	null	null	1.571728
RIMKLB	na	null	null	1.5715611
PARD3B	na	null	null	1.5707656
UCKL1	na	null	null	1.570753
ING1	na	null	null	1.5706059
COL4A2	na	null	null	1.5703374
AL391987.6	na	null	null	1.5702157
PTGES2	na	null	null	1.5683776
AGAP1	na	null	null	1.5681107
RBM33	na	null	null	1.567515
AC008969.1	na	null	null	1.5666707
IFT122	na	null	null	1.5665609
RBPMS	na	null	null	1.5660832
ICAM5	na	null	null	1.5658846
EPHB2	na	null	null	1.5657575
EPHB4	na	null	null	1.5654334
AC005785.1	na	null	null	1.565339
AC018638.2	na	null	null	1.5649391
AC040970.1	na	null	null	1.5637645
AC020910.5	na	null	null	1.5636064
SHB	na	null	null	1.5634516
SPATA25	na	null	null	1.5634253
YAF2	na	null	null	1.5629007
MYH15	na	null	null	1.5626385
SPDYE2	na	null	null	1.5603405
NKTR	na	null	null	1.5601876
CHST12	na	null	null	1.5599068
VPS26B	na	null	null	1.5597808
ARHGAP26	na	null	null	1.559504
AC092053.3	na	null	null	1.5575153
PDCL3P4	na	null	null	1.5573963
ANAPC2	na	null	null	1.5573193
RNF32	na	null	null	1.556372
TRIM52	na	null	null	1.5561829
DNAH17	na	null	null	1.5558511
PSMD6-AS2	na	null	null	1.5551777
ATXN7L2	na	null	null	1.5546582
RPL32P3	na	null	null	1.5543582
AC139795.1	na	null	null	1.5535905
SPDYE6	na	null	null	1.552688
SMURF1	na	null	null	1.551964
FBXL8	na	null	null	1.5518622
PVR	na	null	null	1.5513426
DPH7	na	null	null	1.5500368
COMMD5	na	null	null	1.5494307
ACTA2	na	null	null	1.5492575
ARMC5	na	null	null	1.5492299
FAAP24	na	null	null	1.5487663
RUNX2	na	null	null	1.5480942
LINC01002	na	null	null	1.5477636
PEX6	na	null	null	1.5471472
KRI1	na	null	null	1.5466725
PPP1R15A	na	null	null	1.546401
TBC1D3C	na	null	null	1.5459105
AC110048.2	na	null	null	1.5445907
CEP131	na	null	null	1.5445673
IFT140	na	null	null	1.5444678
HIC1	na	null	null	1.5444664
SMYD3-IT1	na	null	null	1.5438826
FKBP11	na	null	null	1.543781
AP006621.4	na	null	null	1.5436463
HRAT92	na	null	null	1.5434419
CBARP	na	null	null	1.5432348
APBB3	na	null	null	1.542174
AL391244.1	na	null	null	1.5421414
KIF26B	na	null	null	1.5419892
NBPF9	na	null	null	1.5419407
FO538757.1	na	null	null	1.5416355
BCAR1	na	null	null	1.5412377
SIM2	na	null	null	1.5408864
PPP1R3G	na	null	null	1.5408237
KANTR	na	null	null	1.539937
NADK	na	null	null	1.5398428
LPIN3	na	null	null	1.5393345
MUTYH	na	null	null	1.5393295
MYORG	na	null	null	1.539115
SUN2	na	null	null	1.5387093
PERM1	na	null	null	1.538694
INPPL1	na	null	null	1.537607
ZNF674	na	null	null	1.5366628
ATG10	na	null	null	1.5365193
LRRK1	na	null	null	1.5363511
TMPPE	na	null	null	1.5360267
FAM50A	na	null	null	1.5358783
ATP11A	na	null	null	1.534201
ALOX5	na	null	null	1.5341159
C19orf25	na	null	null	1.5337882
RAB40C	na	null	null	1.5330399
TRMT61A	na	null	null	1.5325459
AC097359.2	na	null	null	1.5324175
WASHC1	na	null	null	1.529882
OSBPL7	na	null	null	1.5292643
CROCCP2	na	null	null	1.5290992
PABPN1	na	null	null	1.5290426
SLC16A5	na	null	null	1.5286807
ABCD4	na	null	null	1.5285176
IKBKB	na	null	null	1.528092
CHERP	na	null	null	1.5269498
SPPL2B	na	null	null	1.5254492
AC011479.3	na	null	null	1.5250905
ATP8B3	na	null	null	1.5250394
NKILA	na	null	null	1.5248272
MTOR	na	null	null	1.524752
AL136311.1	na	null	null	1.5244365
AC009053.1	na	null	null	1.5243444
MIR3138	na	null	null	1.5240755
AC105277.1	na	null	null	1.5240754
AC073548.1	na	null	null	1.5240754
PCDHGB6	na	null	null	1.5233766
NUP210	na	null	null	1.5231863
PCDHGA9	na	null	null	1.5231854
AC126755.1	na	null	null	1.5231433
MMRN2	na	null	null	1.5222013
GGA3	na	null	null	1.5221338
NCLN	na	null	null	1.5220928
INTS4P2	na	null	null	1.5213556
CACNB1	na	null	null	1.5212463
ATOH8	na	null	null	1.5208527
AL121603.2	na	null	null	1.5201741
ONECUT1	na	null	null	1.520174
AC027018.1	na	null	null	1.520174
AC055811.1	na	null	null	1.5193518
PRR7-AS1	na	null	null	1.5192777
AC139530.1	na	null	null	1.5186914
AC008870.2	na	null	null	1.5186914
AC146949.1	na	null	null	1.5178311
MOK	na	null	null	1.517428
VEGFC	na	null	null	1.5173248
LZTR1	na	null	null	1.5166204
AP2A2	na	null	null	1.5159422
EIF4A1	na	null	null	1.5155214
AC121761.1	na	null	null	1.5148772
ZCCHC2	na	null	null	1.5138656
CCDC88B	na	null	null	1.513668
MIR619	na	null	null	1.5133888
SFSWAP	na	null	null	1.5125035
FAAP100	na	null	null	1.5122006
CCDC134	na	null	null	1.5120606
AC127502.2	na	null	null	1.511797
TANGO2	na	null	null	1.511092
LRRC56	na	null	null	1.5109576
IPPK	na	null	null	1.5099471
HEXIM1	na	null	null	1.5092143
MICAL3	na	null	null	1.508946
MAML1	na	null	null	1.5088263
AC002558.1	na	null	null	1.5088065
FAM27B	na	null	null	1.5079514
CTIF	na	null	null	1.5078714
BAIAP2	na	null	null	1.5077403
SMG1P4	na	null	null	1.5069618
CBFA2T2	na	null	null	1.5065917
NUDT18	na	null	null	1.5065284
NAGPA	na	null	null	1.5063851
STX10	na	null	null	1.5063016
PROCA1	na	null	null	1.5055246
ARHGAP31	na	null	null	1.5050954
ANGPTL4	na	null	null	1.5050803
ZNF532	na	null	null	1.5050282
PRAM1	na	null	null	1.5036358
ACBD6	na	null	null	1.5026249
LINC02193	na	null	null	1.5024124
ANK1	na	null	null	1.5020832
DVL2	na	null	null	1.5019314
RIMBP3C	na	null	null	1.5019087
SRRT	na	null	null	1.5017554
CCDC85B	na	null	null	1.5014497
ZNF692	na	null	null	1.5011754
AC068587.6	na	null	null	1.5009276
UPF3AP1	na	null	null	1.5006075
AC092171.3	na	null	null	1.5001211
ZFPM1	na	null	null	1.4987569
WWC3	na	null	null	1.4981087
GPR83	na	null	null	1.4978665
DAPK2	na	null	null	1.4972482
TBC1D3D	na	null	null	1.4971533
SCRN2	na	null	null	1.4968525
AC093620.1	na	null	null	1.4958683
SPDYE2B	na	null	null	1.495643
EHD1	na	null	null	1.4951376
GPR146	na	null	null	1.4951342
C19orf47	na	null	null	1.4948605
GRIPAP1	na	null	null	1.4946337
RNASET2	na	null	null	1.4943843
TRIM62	na	null	null	1.4939775
AL645568.1	na	null	null	1.4928665
VWA8	na	null	null	1.4927331
ZSCAN29	na	null	null	1.492584
PPM1F	na	null	null	1.4925418
TMEM204	na	null	null	1.492305
ZNF844	na	null	null	1.4914346
ZNF862	na	null	null	1.4910651
PPP2R3B	na	null	null	1.490862
AL353150.1	na	null	null	1.4897743
KLHDC4	na	null	null	1.4890349
PHF2	na	null	null	1.4889426
ZNRF2P1	na	null	null	1.4887693
LRPAP1	na	null	null	1.488346
AL136984.1	na	null	null	1.4881235
IDUA	na	null	null	1.487997
TMEM86B	na	null	null	1.48796
AC027796.4	na	null	null	1.487669
AL158824.1	na	null	null	1.4864259
DANT2	na	null	null	1.4860225
AC090673.2	na	null	null	1.4859966
MMP17	na	null	null	1.4854302
ABCC1	na	null	null	1.4849999
C3orf62	na	null	null	1.4846975
HCG15	na	null	null	1.4846133
LMNTD2	na	null	null	1.4833089
NOA1	na	null	null	1.4832627
GOLGA8VP	na	null	null	1.481881
HELB	na	null	null	1.4818711
PEX10	na	null	null	1.4807649
RRP9	na	null	null	1.4806347
PRSS53	na	null	null	1.4804603
VPS37D	na	null	null	1.480126
SDF4	na	null	null	1.479843
ABHD15	na	null	null	1.4795243
PTPN18	na	null	null	1.4791219
AC103564.2	na	null	null	1.4791063
AC126335.2	na	null	null	1.4791062
ASGR1	na	null	null	1.4788598
RPARP-AS1	na	null	null	1.4785582
GOLGA8R	na	null	null	1.4785234
LINC02581	na	null	null	1.4779383
PDPR	na	null	null	1.4777462
KRT8P12	na	null	null	1.4774437
PQLC2	na	null	null	1.4768043
DEPDC5	na	null	null	1.4766334
TCTEX1D4	na	null	null	1.4763476
C19orf66	na	null	null	1.4753537
AC084125.2	na	null	null	1.4744023
ZNF236	na	null	null	1.4743233
SIPA1	na	null	null	1.4740466
NCOR2	na	null	null	1.4737136
AC017002.3	na	null	null	1.4737065
PPP1R3F	na	null	null	1.4726797
SARS2	na	null	null	1.4725207
GAS2L1	na	null	null	1.4719281
SLC39A3	na	null	null	1.471459
FBXL18	na	null	null	1.4711847
C22orf46	na	null	null	1.4696324
TRIM3	na	null	null	1.4693162
RNF31	na	null	null	1.4692967
PTPN23	na	null	null	1.468994
TSC2	na	null	null	1.468464
SBNO2	na	null	null	1.4680544
CPSF1	na	null	null	1.4677863
ZCCHC3	na	null	null	1.4659985
CPT1C	na	null	null	1.4659578
NSMF	na	null	null	1.4649522
CPSF4	na	null	null	1.4646164
ADGRL1	na	null	null	1.4641306
AL591623.1	na	null	null	1.463773
CICP11	na	null	null	1.4637051
AC037459.3	na	null	null	1.462966
CYP1B1	na	null	null	1.4629267
RBM14	na	null	null	1.4618611
REX1BD	na	null	null	1.4600595
SH3GLB2	na	null	null	1.4591854
AKT2	na	null	null	1.4590895
MUM1	na	null	null	1.4589298
RABEP2	na	null	null	1.4575838
EPS15L1	na	null	null	1.4563081
AC215219.1	na	null	null	1.4562471
POLR2J2	na	null	null	1.455923
CTBP1	na	null	null	1.455887
UBE2O	na	null	null	1.455632
RPS6KL1	na	null	null	1.4555103
CLPB	na	null	null	1.4552784
TNIP2	na	null	null	1.4515774
STRN4	na	null	null	1.4513212
SLX1B	na	null	null	1.4499918
CGN	na	null	null	1.4499519
R3HCC1	na	null	null	1.449486
TRMT1	na	null	null	1.4486257
FERMT3	na	null	null	1.4477407
CWC25	na	null	null	1.4477255
SULT1A3	na	null	null	1.4474795
FLRT1	na	null	null	1.4470714
GABRR2	na	null	null	1.446905
NPIPB6	na	null	null	1.4468592
NOD1	na	null	null	1.4464893
TANC1	na	null	null	1.4450784
DGKZ	na	null	null	1.4448721
ADCY9	na	null	null	1.4435985
CDC37P1	na	null	null	1.443322
UNKL	na	null	null	1.4425492
AC127024.4	na	null	null	1.4424071
SMG9	na	null	null	1.4420887
RNF207	na	null	null	1.4412853
CAPN15	na	null	null	1.4412242
POLRMTP1	na	null	null	1.4410487
AC116407.4	na	null	null	1.4406781
CSF2RA	na	null	null	1.4406279
RUFY3	na	null	null	1.4405309
GMPPB	na	null	null	1.4394633
USP42	na	null	null	1.4390831
LIMK1	na	null	null	1.4390253
ARHGEF17	na	null	null	1.438796
FBXW5	na	null	null	1.4377245
RPSAP52	na	null	null	1.4375696
NLGN2	na	null	null	1.4367981
GMIP	na	null	null	1.4364055
GUSBP9	na	null	null	1.4362208
AC108010.1	na	null	null	1.43611
TTLL3	na	null	null	1.4360173
LRRC37A4P	na	null	null	1.435991
TXNRD2	na	null	null	1.4358829
AC117382.1	na	null	null	1.4351338
LRRC3	na	null	null	1.4350003
FPGS	na	null	null	1.4347417
IRS2	na	null	null	1.4347079
DAB2IP	na	null	null	1.4342775
LMTK3	na	null	null	1.4339099
FZR1	na	null	null	1.4332848
NKX3-2	na	null	null	1.4325219
PARP6	na	null	null	1.4311167
DEAF1	na	null	null	1.4297398
ACADVL	na	null	null	1.4295583
SNX29	na	null	null	1.4287182
SLC35E2	na	null	null	1.4279429
CLCN6	na	null	null	1.4278347
SOX13	na	null	null	1.4278102
OPRL1	na	null	null	1.4276545
ROBO3	na	null	null	1.4267193
AC073592.3	na	null	null	1.4263703
PDE10A	na	null	null	1.4263549
KDM6A	na	null	null	1.42618
MYO19	na	null	null	1.4259019
CCAR2	na	null	null	1.425081
EP400NL	na	null	null	1.4249908
SNRNP70	na	null	null	1.4244542
NAV3	na	null	null	1.424147
AC004865.2	na	null	null	1.4238733
SYTL4	na	null	null	1.4238088
PHC1	na	null	null	1.4235917
STK25	na	null	null	1.4235433
ZBTB39	na	null	null	1.423491
AL353719.1	na	null	null	1.422957
PLIN1	na	null	null	1.4229568
ZSCAN4	na	null	null	1.4229568
EPHA1-AS1	na	null	null	1.4229568
EXTL1	na	null	null	1.4229568
AL132656.2	na	null	null	1.4229568
AC012557.1	na	null	null	1.4229567
RGS9BP	na	null	null	1.4229567
HAPLN2	na	null	null	1.4229567
AC004980.1	na	null	null	1.4228656
PCDHB5	na	null	null	1.4219304
PNN	na	null	null	1.4217963
NOP2	na	null	null	1.4202889
RBFA	na	null	null	1.420116
AP000925.1	na	null	null	1.4200982
SPDYE10P	na	null	null	1.419993
CTSK	na	null	null	1.4199643
POLR3E	na	null	null	1.4194667
PCNX2	na	null	null	1.4192163
ZNF219	na	null	null	1.4190483
RTEL1	na	null	null	1.4188775
SART1	na	null	null	1.418094
PLPPR3	na	null	null	1.4177334
SHOX2	na	null	null	1.4176977
NBPF8	na	null	null	1.41707
AKAP8L	na	null	null	1.4166214
ARHGAP4	na	null	null	1.4161618
ZDHHC14	na	null	null	1.4158454
ERAP2	na	null	null	1.4156586
GOLGA1	na	null	null	1.4152094
PCDHB4	na	null	null	1.4150009
TBC1D3P1	na	null	null	1.4149339
LRRC47	na	null	null	1.4125972
PACS2	na	null	null	1.4124447
CCDC137	na	null	null	1.4122728
LINC01347	na	null	null	1.4113778
AL139805.1	na	null	null	1.4109089
MORN1	na	null	null	1.4108168
PCDHGB3	na	null	null	1.4102678
NDRG4	na	null	null	1.4102186
BTN2A3P	na	null	null	1.4093139
STAT5A	na	null	null	1.4092691
SLC13A3	na	null	null	1.4091805
RPL23AP17	na	null	null	1.4091136
FOXD4L5	na	null	null	1.4091136
AC007292.1	na	null	null	1.4091136
LRRN2	na	null	null	1.4091135
A3GALT2	na	null	null	1.4091135
CMTR1	na	null	null	1.4090623
MBD3	na	null	null	1.4089414
AC142381.3	na	null	null	1.4086802
AC090124.3	na	null	null	1.4080462
TMEM191C	na	null	null	1.4077077
Z92544.2	na	null	null	1.4075875
TCIRG1	na	null	null	1.4060903
PTGER4	na	null	null	1.4057046
SLC18B1	na	null	null	1.4054159
MVD	na	null	null	1.4037738
ASH1L-AS1	na	null	null	1.4032358
RAB11FIP5	na	null	null	1.4025314
MAP7D1	na	null	null	1.4024738
ADAMTS12	na	null	null	1.4020238
AURKC	na	null	null	1.4017794
TLL2	na	null	null	1.4016278
MAD1L1	na	null	null	1.4016055
CDPF1	na	null	null	1.4012619
TBC1D3I	na	null	null	1.4010199
AL161452.1	na	null	null	1.4008938
AC126365.1	na	null	null	1.4008938
ADRB1	na	null	null	1.4008938
AC068831.2	na	null	null	1.4008938
PIGHP1	na	null	null	1.4008937
PCDHB3	na	null	null	1.4005532
RBM10	na	null	null	1.4001403
AC138393.1	na	null	null	1.399316
TRAPPC12	na	null	null	1.3984854
LIN7B	na	null	null	1.3979205
ADGRF3	na	null	null	1.3975334
PARD6G-AS1	na	null	null	1.3962045
TMEM147-AS1	na	null	null	1.3962033
DMAP1	na	null	null	1.3957347
AC078820.1	na	null	null	1.3954493
SPDYE1	na	null	null	1.3951555
TBC1D3G	na	null	null	1.3945022
ACTG1P3	na	null	null	1.3943052
AC215522.2	na	null	null	1.3940966
ZNF497	na	null	null	1.3938612
PARP12	na	null	null	1.3937787
PYCR3	na	null	null	1.3932099
NEK11	na	null	null	1.3922467
ADA	na	null	null	1.3915775
COL20A1	na	null	null	1.3915775
RNF40	na	null	null	1.3913525
TNRC6C	na	null	null	1.3904043
ASIP	na	null	null	1.3898332
GSDMD	na	null	null	1.3894069
CDC42EP3P1	na	null	null	1.388683
MAP4K2	na	null	null	1.3873267
TARSL2	na	null	null	1.3867698
AP000897.2	na	null	null	1.3864373
HSF1	na	null	null	1.3855973
SMG1P7	na	null	null	1.3854804
ZGLP1	na	null	null	1.3846443
SNX19	na	null	null	1.3834695
SPDYE8P	na	null	null	1.3831455
CCDC84	na	null	null	1.3830857
SHKBP1	na	null	null	1.3815738
KCNC1	na	null	null	1.3811057
SUZ12P1	na	null	null	1.3797634
FOSB	na	null	null	1.3794625
CORO1A	na	null	null	1.3793541
AC010203.1	na	null	null	1.3792629
ZNF514	na	null	null	1.3789662
TECPR2	na	null	null	1.3784293
ENTPD6	na	null	null	1.378378
ZNF584	na	null	null	1.3781914
GNA11	na	null	null	1.377953
FRMD4B	na	null	null	1.3776168
ATP2A3	na	null	null	1.3772058
STARD3	na	null	null	1.3770931
PLCB3	na	null	null	1.3765043
SKIV2L	na	null	null	1.3761029
RAVER1	na	null	null	1.375989
VWA7	na	null	null	1.3756778
GADD45B	na	null	null	1.3747011
AL157838.1	na	null	null	1.3746619
DHX34	na	null	null	1.3746575
SNRNP25	na	null	null	1.3739549
SLC10A1	na	null	null	1.3738827
ERBB2	na	null	null	1.3737118
OGG1	na	null	null	1.3732024
CNKSR1	na	null	null	1.3730052
EPPK1	na	null	null	1.3727959
SRGAP2	na	null	null	1.3721687
BMS1P11	na	null	null	1.3716984
PHC1P1	na	null	null	1.371502
ODF2	na	null	null	1.3694555
FCHSD1	na	null	null	1.3692358
C9orf131	na	null	null	1.3685875
AC016738.1	na	null	null	1.3685802
TBC1D9B	na	null	null	1.3684599
DCAF15	na	null	null	1.3680042
CAPS	na	null	null	1.367713
VPS9D1	na	null	null	1.3665693
JUN	na	null	null	1.3661286
CLN8	na	null	null	1.3659358
PLXNA2	na	null	null	1.3651755
NXN	na	null	null	1.3650924
MLXIP	na	null	null	1.3645042
TNPO2	na	null	null	1.3644576
TMEM44	na	null	null	1.3637848
[truncated: 17,200 more rows]
