# Supplementary figures and images for: Heparin-based hydrogel scaffolding alters the transcriptomic profile and increases the chemoresistance of MDA-MB-231 triple-negative breast cancer cells
Source: Royal Society of Chemistry journal article supplement (doi:10.1039/c9bm01481k), 2020-01-01

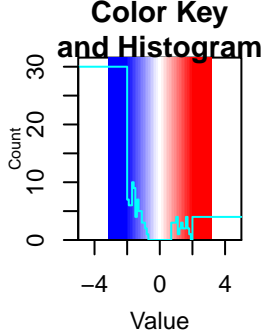

# Hallmark

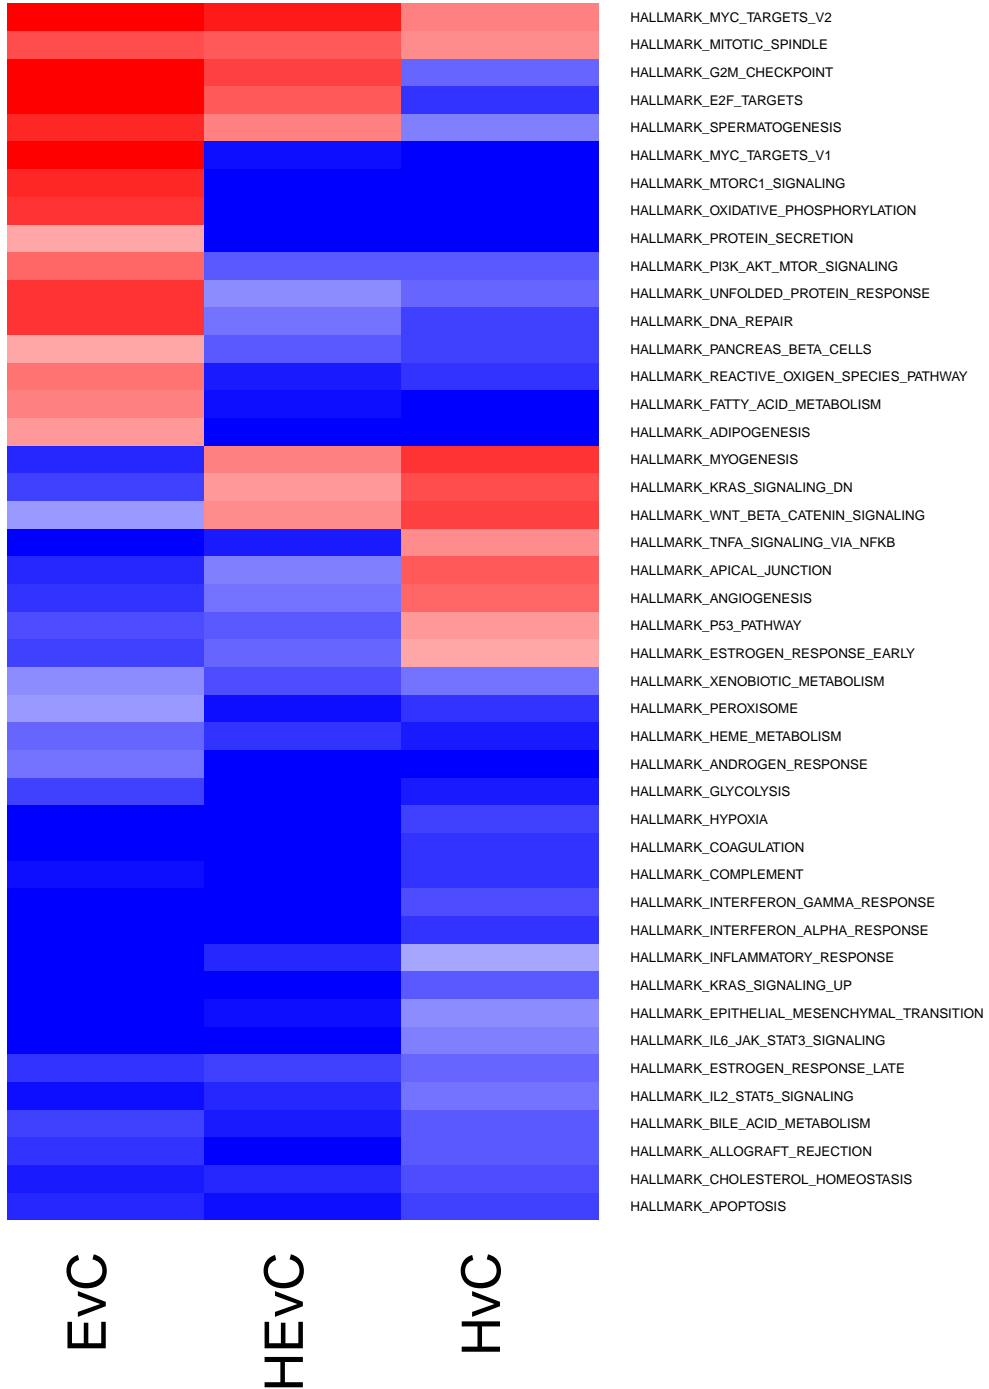

Supplement: c9bm01481k2.zip [file c9bm01481k2.zip]

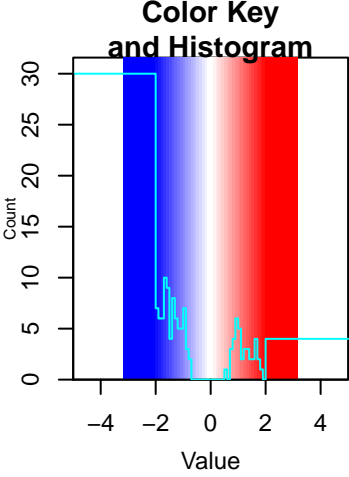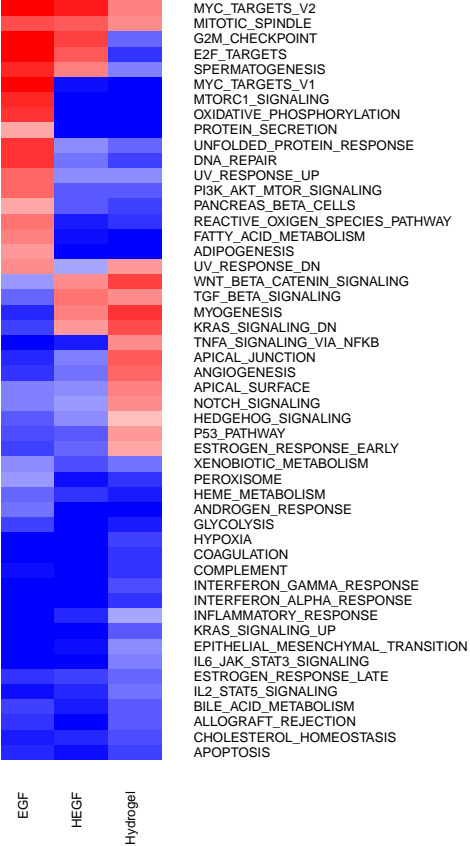

Supplement: c9bm01481k2.zip [file c9bm01481k2.zip]
